# Supplementary material for: Grazing by large savanna herbivores indirectly alters ant diversity and promotes resource monopolisation
Source: PeerJ. 2019 Jan 11;7:e6226. doi: 10.7717/peerj.6226 (PMC6330944; doi:10.7717/peerj.6226)
Supplement: Supplemental Information 1 [file peerj-07-6226-s001.xlsx]

## Sheet: Metadata
Workbook 1	Trap Results Bunch Grass	Results from the manipulated experiments for the bunch grass sites
Column Names	Explanation
Treatment name	One of the four treatments used, either fine, coarse, control or bait
Time	Time when bait was first monopolised
BSI	BSI of ants first monopolising baits
Monopolised
Treatment number	Fine = 1, Coarse = 2, control = 3 and bait = 4
Habitat	Bunch grass habitat
Season	Summer or winter
Workbook 02	Trap Results Grazing Lawn	Results from the manipulated experiments for the bunch grass sites
Column Names	Explanation
Treatment name	One of the four treatments used, either fine, coarse, control or bait
Time	Time when bait was first monopolised
BSI	BSI of ants first monopolising baits
Monopolisation
Treatment number	Fine = 1, Coarse = 2, control = 3 and bait = 4
Habitat	Grazing Lawn habitat
Season	Summer or winter
Workbook 03	Baits Discovered	Results from the manipulated experiments for the bunch grass and grazing lawn sites
Column Names	Explanation
Habitat	Grazing lawn or bunch grass habitat
season	Summer or winter
Time	The time at which the number of baits that had been discovered were recorded
Number of Baits Discovered	The number of baits discovered at 60, 120 and 180 minutes
Workbook 04	Ant sizes bunch grass	The Body size indext of ants monopolising the bunch grass habitat
Column Names	Explanation
Ant species	The identified ant species name
BSI	Body size index
Frequency	Number of times that ant species was found monopolising the bunch grass habitat
Habitat	Bunch grass habitat
Season	Summer or winter
Workbook 05	Ant sizes grazing lawn	The Body size indext of ants monopolising the grazing lawn habitat
Column Names	Explanation
Ant species	The identified ant species name
BSI	Body size index
Frequency	Number of times that ant species was found monopolising the grazing lawn habitat
Habitat	Grazing lawn habitat
Season	Summer or winter
Workbook 06	Monopolised Frequency	Frequency of ant species monopolising habitats and season
Column Names	Explanation
Ant species	The identified ant species name
BSI	Body size index
Frequency	Number of times that ant species was found monopolising the grazing lawn habitat
Habitat	Grazing lawn habitat
Season	Summer or winter
Workbook 07	Site co-ordinates	Site co-ordinates in decimal degrees
Column Names	Explanation
Habitat	Grazing lawn or bunch grass habitat
Site	Site number
South (º)	South
East (º)	East
Altitude (m)	Altitude
Identity	Code to identify each site
Workbook 08	Pitfall Trap PRIMER data	Species found in the pitfall traps
Column Names	Explanation
BS1	Bunch grass habitat 1
BS2	Bunch grass habitat 2
BS3	Bunch grass habitat 3
BS4	Bunch grass habitat 4
BS5	Bunch grass habitat 5
BS6	Bunch grass habitat 6
LS1	Grazing lawn habitat 1
LS2	Grazing lawn habitat 2
LS3	Grazing lawn habitat 3
LS4	Grazing lawn habitat 4
LS5	Grazing lawn habitat 5
LS6	Grazing lawn habitat 6
Workbook 09	Vegetation structure	Data collected to determine the vegetation structure along a 100 m transect every 8 m
Column Names	Explanation
Moss	Presence or absence of moss
Dung	Presence or absence of dung
Forb (m)	Height of forbs
Small woody (m)	Height of small woody species
Grass (m)	Height of grass
Litter	Presence or absence of litter
Bare ground (P/A)	Presence or absence of bare ground
Rock (P/A)	Presence or absence of rock
Wood	Presence or absence of wood
Stones	Presence or absence of stones
Distance to closest tree (m)	Distance measured from transect to closest tree
Canopy cover (%)	Canopy % cover measured by looking through a 4.5 cm diameter cylinder
Habitat	Bunch grass or grazing lawn
Season	Summer or winter
Workbook 10	Visible dots	Data collected to determine the vegetation structure along a 100 m transect every 8 m
Column Names	Explanation
Number of dots	Number of dots seen from 2m away
Height in cm	Number of dots seen at 3cm, 15cm, 30cm and 50cm
Habitat	Bunch grass or grazing lawn
Season	Summer or winter

## Sheet: 01 Trap Results Bunch Grass
Treatment name	Time	Sizes	Monopolised	Treatment number	Habitat	Season
Fine Bunch	130	0.4804	3	1	Bunch Grass	Summer
Fine Bunch	94.1667	1.471	0	1	Bunch Grass	Summer
Fine Bunch	69	1.2186	2	1	Bunch Grass	Summer
Fine Bunch	60.1667	0.5604	4	1	Bunch Grass	Summer
Fine Bunch	101.333	0.551	0	1	Bunch Grass	Summer
Fine Bunch	130	0.209	0	1	Bunch Grass	Summer
Coarse Bunch	31	1.15767	3	2	Bunch Grass	Summer
Coarse Bunch	63.3333	0.445833	4	2	Bunch Grass	Summer
Coarse Bunch	28.1667	1.11683	1	2	Bunch Grass	Summer
Coarse Bunch	69.1667	0.5126	4	2	Bunch Grass	Summer
Coarse Bunch	46.1667	0.3904	3	2	Bunch Grass	Summer
Coarse Bunch	93.5	0.44125	0	2	Bunch Grass	Summer
Control Bunch	36.6667	1.16408	3	3	Bunch Grass	Summer
Control Bunch	25	1.28383	1	3	Bunch Grass	Summer
Control Bunch	48.1667	1.12467	2	3	Bunch Grass	Summer
Control Bunch	57.3333	1.06783	2	3	Bunch Grass	Summer
Control Bunch	32.1667	1.44233	1	3	Bunch Grass	Summer
Control Bunch	90.1667	0.6545	1	3	Bunch Grass	Summer
Bait Bunch	14.5	5.01633	4	4	Bunch Grass	Summer
Bait Bunch	12	2.31333	3	4	Bunch Grass	Summer
Bait Bunch	17.1667	2.66567	3	4	Bunch Grass	Summer
Bait Bunch	22	1.69983	3	4	Bunch Grass	Summer
Bait Bunch	14.5	1.05467	5	4	Bunch Grass	Summer
Bait Bunch	55.8333	2.2856	2	4	Bunch Grass	Summer
Fine Bunch W	96.6667	0.44	4	1	Bunch Grass	Winter
Fine Bunch W	112.333	0.8404	5	1	Bunch Grass	Winter
Fine Bunch W	142.333	0.749333	2	1	Bunch Grass	Winter
Fine Bunch W	40.3333	0.351667	5	1	Bunch Grass	Winter
Fine Bunch W	160.667	0.488	1	1	Bunch Grass	Winter
Fine Bunch W	155.5	0.558667	2	1	Bunch Grass	Winter
Coarse Bunch W	73.8333	0.5906	4	2	Bunch Grass	Winter
Coarse Bunch W	99.5	0.4504	2	2	Bunch Grass	Winter
Coarse Bunch W	142.5	0.655333	1	2	Bunch Grass	Winter
Coarse Bunch W	33.5	0.381667	5	2	Bunch Grass	Winter
Coarse Bunch W	122.833	0.408667	1	2	Bunch Grass	Winter
Coarse Bunch W	106.833	0.450333	5	2	Bunch Grass	Winter
Control Bunch W	68.3333	0.496833	4	3	Bunch Grass	Winter
Control Bunch W	95.8333	0.4752	3	3	Bunch Grass	Winter
Control Bunch W	110.833	3.6785	3	3	Bunch Grass	Winter
Control Bunch W	32	0.351667	3	3	Bunch Grass	Winter
Control Bunch W	91.3333	0.4144	3	3	Bunch Grass	Winter
Control Bunch W	51.6667	0.467	5	3	Bunch Grass	Winter
Bait Bunch W	34.8333	0.910833	5	4	Bunch Grass	Winter
Bait Bunch W	38.6667	0.358167	5	4	Bunch Grass	Winter
Bait Bunch W	39.6667	3.1966	3	4	Bunch Grass	Winter
Bait Bunch W	36.1667	0.315333	6	4	Bunch Grass	Winter
Bait Bunch W	41	0.400333	4	4	Bunch Grass	Winter
Bait Bunch W	24.5	0.890667	6	4	Bunch Grass	Winter

## Sheet: 02 Trap Results Grazing Lawn
Treatment name	Time	Sizes	Monopolisation	Treatment number	Habitat	Season
Fine Grazing	31	1.1255	3	1	Grazing Lawn	Summer
Fine Grazing	80.1667	0.488	4	1	Grazing Lawn	Summer
Fine Grazing	18.8333	1.06283	3	1	Grazing Lawn	Summer
Fine Grazing	102.333	0.535333	3	1	Grazing Lawn	Summer
Fine Grazing	27	0.654333	5	1	Grazing Lawn	Summer
Fine Grazing	67.8333	1.2446	3	1	Grazing Lawn	Summer
Coarse Grazing	43	1.295	3	2	Grazing Lawn	Summer
Coarse Grazing	84	0.488	5	2	Grazing Lawn	Summer
Coarse Grazing	26.8333	2.5585	3	2	Grazing Lawn	Summer
Coarse Grazing	48.8333	0.908	3	2	Grazing Lawn	Summer
Coarse Grazing	39.1667	0.6246	5	2	Grazing Lawn	Summer
Coarse Grazing	77.8333	0.38	4	2	Grazing Lawn	Summer
Control Grazing	16.3333	0.524	5	3	Grazing Lawn	Summer
Control Grazing	61.8333	0.556	2	3	Grazing Lawn	Summer
Control Grazing	15.3333	3.30633	6	3	Grazing Lawn	Summer
Control Grazing	18.6667	0.869667	3	3	Grazing Lawn	Summer
Control Grazing	26.6667	1.835	4	3	Grazing Lawn	Summer
Control Grazing	63.5	1.308	4	3	Grazing Lawn	Summer
Bait Grazing	11	1.962	4	4	Grazing Lawn	Summer
Bait Grazing	8.66667	1.96	5	4	Grazing Lawn	Summer
Bait Grazing	2	3.30633	5	4	Grazing Lawn	Summer
Bait Grazing	8.33333	1.19567	5	4	Grazing Lawn	Summer
Bait Grazing	6.5	1.1665	3	4	Grazing Lawn	Summer
Bait Grazing	40.1667	1.2776	5	4	Grazing Lawn	Summer
Fine Grazing W	63.1667	0.796333	6	1	Grazing Lawn	Winter
Fine Grazing W	143.5	0.488	2	1	Grazing Lawn	Winter
Fine Grazing W	36.8333	0.5312	6	1	Grazing Lawn	Winter
Fine Grazing W	99	0.4534	4	1	Grazing Lawn	Winter
Fine Grazing W	63.3333	0.5024	4	1	Grazing Lawn	Winter
Fine Grazing W	52.3333	0.473167	5	1	Grazing Lawn	Winter
Coarse Grazing W	57.1667	0.796333	4	2	Grazing Lawn	Winter
Coarse Grazing W	133.5	0.488	1	2	Grazing Lawn	Winter
Coarse Grazing W	83.3333	0.9775	4	2	Grazing Lawn	Winter
Coarse Grazing W	63.6667	0.488	5	2	Grazing Lawn	Winter
Coarse Grazing W	73.3333	0.401	5	2	Grazing Lawn	Winter
Coarse Grazing W	95.6667	0.5416	3	2	Grazing Lawn	Winter
Control Grazing W	25.8333	0.506	4	3	Grazing Lawn	Winter
Control Grazing W	62.1667	0.881667	4	3	Grazing Lawn	Winter
Control Grazing W	34.5	1.261	5	3	Grazing Lawn	Winter
Control Grazing W	37.6667	0.507333	6	3	Grazing Lawn	Winter
Control Grazing W	87.6667	0.418667	4	3	Grazing Lawn	Winter
Control Grazing W	44.8333	0.473	4	3	Grazing Lawn	Winter
Bait Grazing W	26.3333	0.814333	3	4	Grazing Lawn	Winter
Bait Grazing W	32.6667	0.551333	4	4	Grazing Lawn	Winter
Bait Grazing W	11.8333	0.612	4	4	Grazing Lawn	Winter
Bait Grazing W	23.8333	0.612333	4	4	Grazing Lawn	Winter
Bait Grazing W	36.1667	1.19633	5	4	Grazing Lawn	Winter
Bait Grazing W	28.1667	0.377833	6	4	Grazing Lawn	Winter

## Sheet: 03 Baits Discovered
Habitat	season	Time	Number of Baits Discovered
Bunch Grass	Summer	60	16
Bunch Grass	Summer	60	15
Bunch Grass	Summer	60	13
Bunch Grass	Summer	60	15
Bunch Grass	Summer	60	14
Bunch Grass	Summer	60	5
Bunch Grass	Winter	60	14
Bunch Grass	Winter	60	12
Bunch Grass	Winter	60	9
Bunch Grass	Winter	60	16
Bunch Grass	Winter	60	6
Bunch Grass	Winter	60	10
Bunch Grass	Summer	120	18
Bunch Grass	Summer	120	17
Bunch Grass	Summer	120	19
Bunch Grass	Summer	120	21
Bunch Grass	Summer	120	15
Bunch Grass	Summer	120	9
Bunch Grass	Winter	120	17
Bunch Grass	Winter	120	13
Bunch Grass	Winter	120	8
Bunch Grass	Winter	120	24
Bunch Grass	Winter	120	14
Bunch Grass	Winter	120	17
Bunch Grass	Summer	180	22
Bunch Grass	Summer	180	22
Bunch Grass	Summer	180	23
Bunch Grass	Summer	180	22
Bunch Grass	Summer	180	23
Bunch Grass	Summer	180	15
Bunch Grass	Winter	180	21
Bunch Grass	Winter	180	19
Bunch Grass	Winter	180	18
Bunch Grass	Winter	180	24
Bunch Grass	Winter	180	16
Bunch Grass	Winter	180	21
Grazing Lawn	Summer	60	23
Grazing Lawn	Summer	60	14
Grazing Lawn	Summer	60	24
Grazing Lawn	Summer	60	17
Grazing Lawn	Summer	60	23
Grazing Lawn	Summer	60	16
Grazing Lawn	Winter	60	18
Grazing Lawn	Winter	60	8
Grazing Lawn	Winter	60	17
Grazing Lawn	Winter	60	13
Grazing Lawn	Winter	60	17
Grazing Lawn	Winter	60	15
Grazing Lawn	Summer	120	22
Grazing Lawn	Summer	120	16
Grazing Lawn	Summer	120	24
Grazing Lawn	Summer	120	10
Grazing Lawn	Summer	120	24
Grazing Lawn	Summer	120	16
Grazing Lawn	Winter	120	23
Grazing Lawn	Winter	120	15
Grazing Lawn	Winter	120	21
Grazing Lawn	Winter	120	22
Grazing Lawn	Winter	120	20
Grazing Lawn	Winter	120	18
Grazing Lawn	Summer	180	24
Grazing Lawn	Summer	180	24
Grazing Lawn	Summer	180	24
Grazing Lawn	Summer	180	20
Grazing Lawn	Summer	180	24
Grazing Lawn	Summer	180	21
Grazing Lawn	Winter	180	24
Grazing Lawn	Winter	180	18
Grazing Lawn	Winter	180	22
Grazing Lawn	Winter	180	23
Grazing Lawn	Winter	180	22
Grazing Lawn	Winter	180	23

## Sheet: 04 Ant sizes bunch grass
Ant species	BSI	Frequency	Habitat	Season
Monomorium Sp. J	0.17	4	Bunch Grass	Winter
Monomorium Sp. C	0.2	4	Bunch Grass	Summer
Monomorium Sp. C	0.2	2	Bunch Grass	Winter
Monomorium Sp. D	0.209444	11	Bunch Grass	Summer
Monomorium Sp. D	0.209444	2	Bunch Grass	Winter
Monomoriun Sp. F	0.22	4	Bunch Grass	Summer
Monomoriun Sp. F	0.22	2	Bunch Grass	Winter
Pheidole Sp.H	0.325417	9	Bunch Grass	Summer
Lepisiota Sp.B	0.35	1	Bunch Grass	Summer
Lepisiota Sp.B	0.35	5	Bunch Grass	Winter
Pheidole Sp. G	0.388194	19	Bunch Grass	Summer
Pheidole Sp. G	0.388194	51	Bunch Grass	Winter
Camponotus Sp.B	0.432	2	Bunch Grass	Winter
Monomorium delagoense	0.4875	8	Bunch Grass	Summer
Monomorium delagoense	0.4875	10	Bunch Grass	Winter
Lepisiota Sp.A	0.5	1	Bunch Grass	Winter
Pheidole Sp.N	0.595833	1	Bunch Grass	Summer
Pheidole Sp.N	0.595833	4	Bunch Grass	Winter
Tetramorium notiale	0.627083	4	Bunch Grass	Summer
Tetramorium Sp.G	0.6375	1	Bunch Grass	Winter
Tetramorium sericerventre	0.692222	1	Bunch Grass	Summer
Monomorium Sp. A	0.7	5	Bunch Grass	Summer
Monomorium Sp. A	0.7	14	Bunch Grass	Winter
Pheidole Sp.O	0.781389	1	Bunch Grass	Winter
Crematogaster Sp. B	0.885	1	Bunch Grass	Winter
Crematogaster Sp. A	1.09556	1	Bunch Grass	Winter
Tetramorium setuliferum	1.17813	2	Bunch Grass	Summer
Tetramorium setuliferum	1.17813	1	Bunch Grass	Winter
Anoplolepis Sp. C	1.18125	1	Bunch Grass	Summer
Pheidole Sp. B	1.42083	1	Bunch Grass	Winter
Camponotus cintellus	2.33833	12	Bunch Grass	Summer
Camponotus cintellus	2.33833	2	Bunch Grass	Winter
Mesonponera Sp. A	2.635	1	Bunch Grass	Winter
Myrmicaria natalensis	4.69583	4	Bunch Grass	Summer
Anoplolepis custodiens	4.80194	5	Bunch Grass	Summer
Bothroponera kruegeri	5.33	1	Bunch Grass	Summer
Odontomarchus Sp.A	5.81	3	Bunch Grass	Summer
Polyrachis schistacae	12.7933	1	Bunch Grass	Summer
Polyrachis schistacae	12.7933	3	Bunch Grass	Winter
Camponotus Sp. C		1	Bunch Grass	Summer
Technomyrmex Sp. A		1	Bunch Grass	Winter

## Sheet: 05 Ant sizes Grazing lawn
Ant species	BSI	Frequency	Habitat	Season
Monomorium Sp. J	0.17	5	Grazing Lawn	Summer
Monomorium Sp. D	0.209444	4	Grazing Lawn	Summer
Monomorium Sp. K	0.315	17	Grazing Lawn	Summer
Lepisiota Sp.B	0.35	1	Grazing Lawn	Summer
Tetramoriun sp. Nr. Constanciae	0.432778	3	Grazing Lawn	Summer
Monomorium delagoense	0.4875	44	Grazing Lawn	Summer
Pheidole Sp.N	0.595833	14	Grazing Lawn	Summer
Pheidole Sp. A	0.66375	1	Grazing Lawn	Summer
Tetramorium sericerventre	0.692222	6	Grazing Lawn	Summer
Pheidole Sp.L	0.803056	9	Grazing Lawn	Summer
Crematogaster Sp. B	0.885	1	Grazing Lawn	Summer
Camponotus cintellus	2.33833	4	Grazing Lawn	Summer
Ocymyrmex fortior	4.55	3	Grazing Lawn	Summer
Anoplolepis custodiens	4.80194	20	Grazing Lawn	Summer
Camponotus Sp. C		1	Grazing Lawn	Summer
Monomorium Sp. J	0.17	3	Grazing Lawn	Winter
Monomorium Sp. D	0.209444	13	Grazing Lawn	Winter
Monomorium Sp. K	0.315	2	Grazing Lawn	Winter
Pheidole Sp. G	0.388194	1	Grazing Lawn	Winter
Monomorium delagoense	0.4875	69	Grazing Lawn	Winter
Pheidole Sp.N	0.595833	12	Grazing Lawn	Winter
Pheidole Sp. A	0.66375	6	Grazing Lawn	Winter
Tetramorium sericerventre	0.692222	2	Grazing Lawn	Winter
Pheidole Sp.O	0.781389	5	Grazing Lawn	Winter
Pheidole Sp.L	0.803056	9	Grazing Lawn	Winter
Pheidole Sp.P	0.883333	2	Grazing Lawn	Winter
Messor Sp.A	2.32222	1	Grazing Lawn	Winter
Camponotus cintellus	2.33833	4	Grazing Lawn	Winter
Anoplolepis custodiens	4.80194	2	Grazing Lawn	Winter
Anoplolepis Sp. B		1	Grazing Lawn	Winter

## Sheet: 06 Monopolised Frequency
Ant species	BSI	Frequency	Habitat	Season
Monomorium Sp. J	0.17	5	Grazing Lawn	Summer
Monomorium Sp. D	0.209444	4	Grazing Lawn	Summer
Monomorium Sp. K	0.315	17	Grazing Lawn	Summer
Lepisiota Sp.B	0.35	1	Grazing Lawn	Summer
Tetramoriun sp. Nr. Constanciae	0.432778	3	Grazing Lawn	Summer
Monomorium delagoense	0.4875	44	Grazing Lawn	Summer
Pheidole Sp.N	0.595833	14	Grazing Lawn	Summer
Pheidole Sp. A	0.66375	1	Grazing Lawn	Summer
Tetramorium sericerventre	0.692222	6	Grazing Lawn	Summer
Pheidole Sp.L	0.803056	9	Grazing Lawn	Summer
Crematogaster Sp. B	0.885	1	Grazing Lawn	Summer
Camponotus cintellus	2.33833	4	Grazing Lawn	Summer
Ocymyrmex fortior	4.55	3	Grazing Lawn	Summer
Anoplolepis custodiens	4.80194	20	Grazing Lawn	Summer
Camponotus Sp. C		1	Grazing Lawn	Summer
Monomorium Sp. J	0.17	3	Grazing Lawn	Winter
Monomorium Sp. D	0.209444	13	Grazing Lawn	Winter
Monomorium Sp. K	0.315	2	Grazing Lawn	Winter
Pheidole Sp. G	0.388194	1	Grazing Lawn	Winter
Monomorium delagoense	0.4875	69	Grazing Lawn	Winter
Pheidole Sp.N	0.595833	12	Grazing Lawn	Winter
Pheidole Sp. A	0.66375	6	Grazing Lawn	Winter
Tetramorium sericerventre	0.692222	2	Grazing Lawn	Winter
Pheidole Sp.O	0.781389	5	Grazing Lawn	Winter
Pheidole Sp.L	0.803056	9	Grazing Lawn	Winter
Pheidole Sp.P	0.883333	2	Grazing Lawn	Winter
Messor Sp.A	2.32222	1	Grazing Lawn	Winter
Camponotus cintellus	2.33833	4	Grazing Lawn	Winter
Anoplolepis custodiens	4.80194	2	Grazing Lawn	Winter
Anoplolepis Sp. B		1	Grazing Lawn	Winter

## Sheet: 07 Site Coordinates
Habitat	Grazing Lawn
Site	South (º)	East (º)	Altitude (m)	Identity
1.1	-28.2411	31.809	135	LS1
1.2	-28.2412	31.8096	140
2.1	-28.2457	31.8026	122	LS2
2.2	-28.2462	31.8025	127
3.1	-28.2738	31.7459	243	LS3
3.2	-28.274	31.7464	242
4.1	-28.2836	31.7413	252	LS4
4.2	-28.2838	31.7409	256
5.1	-28.2762	31.7447	231	LS5
5.2	-28.2764	31.7439	230
6.1	-28.2332	31.8175	131	LS6
6.2	28.2324	31.8173	123
Habitat	Bunch Grass
Site	South (º)	East (º)	Altitude (m)	Identity
1.1	-28.2435	31.7973	129	BS1
1.2	-28.2439	31.7974	132
2.1	-28.2429	31.7943	136	BS2
2.2	-28.2434	31.7942	137
3.1	-28.2774	31.7443	229	BS3
3.2	-28.2772	31.7449	233
4.1	-28.2829	31.7417	244	BS4
4.2	-28.2825	31.7422	241
5.1	-28.2886	31.743	254	BS5
6.1	-28.2384	31.7902	154	BS6
6.2	-28.239	31.7905	159

## Sheet: 08 Pitfall Trap PRIMER data
	BS1	BS2	BS3	BS4	BS5	BS6	LS1	LS2	LS3	LS4	LS5	LS6
Dorylus Sp. F	0	0	0	0	0	0	0	35	0	0	0	0
Dorylus Sp. G	0	0	0	0	0	0	0	0	0	0	2	0
Dorylus Sp. H	0	0	0	0	0	0	0	0	0	0	4	0
Anoplolepis custodiens	0	0	2105	0	0	0	524	177	8667	79	4700	0
Anoplolepis Sp. D	1	1	2	0	3	4	6	16	1	0	0	84
Camponotus cintellus	0	1	0	0	0	1	0	0	0	5	3	4
Camponoyus Sp. L	0	0	0	1	0	1	0	0	0	0	0	0
Camponotus Sp. A	0	0	0	0	0	0	2	1	0	0	1	0
Camponotus Sp. F	0	0	0	0	1	0	0	0	0	0	0	0
Camponotus Sp.J	0	0	1	0	2	0	3	0	0	0	0	0
Lepisiota Sp. A	0	0	0	1	1	1	0	0	0	0	0	1
Lepisiota Sp. H	0	0	0	0	0	0	0	0	0	4	2	0
Lepisiota Sp. I	2	0	0	3	2	1	0	0	0	0	2	2
Polyrachis shistacea	0	0	0	0	0	0	0	0	0	2	2	0
Crematogaster Sp. A	0	0	0	0	3	0	0	0	0	0	0	0
Tetramorium contanciae	0	0	0	0	0	0	0	47	0	0	33	1
Myrmicaria natalensis	38	54	24	0	0	18	0	0	0	0	0	0
Monomorium delagoense	235	5	34	37	69	142	228	118	7	153	331	212
Monomorium Sp. C	4	6	10	3	15	7	4	0	1	9	8	23
Monomorium Sp.D	21	28	40	9	15	16	19	3	18	8	21	26
Monomorium Sp. E	2	0	1	0	0	0	0	0	0	0	1	0
Monomorium Sp. F	5	0	0	0	0	0	0	0	0	4	1	0
Monomorium Sp. J	0	0	2	1	0	0	0	1	0	0	0	0
Monomorium Sp. K	13	3	34	0	0	0	4	2	1	17	0	17
Monomorium Sp.M	0	0	0	43	5	17	0	0	0	0	0	0
Monomorium Sp. A	8	13	1	0	0	0	0	0	0	0	1	0
Monomorium Sp. N	0	0	0	0	0	0	0	0	0	1	0	0
Ocymyrmex fortior	0	1	0	1	0	4	8	0	0	2	2	0
Messor Sp. A	0	0	0	0	0	0	5	1	0	2	0	0
PheidoleI Sp. A	79	107	44	2	3	45	129	1	0	36	65	102
Pheidole Sp. B	0	0	6	0	0	0	1	0	0	0	18	0
Pheidole Sp. C	0	0	0	0	0	2	0	0	0	0	0	0
Pheidole Sp. G	158	30	3	96	65	26	74	55	89	18	8	3
PheidoleI Sp. H	0	67	16	0	0	26	6	1	2	15	8	1
Pheidole Sp. L	0	0	0	0	0	0	0	0	0	12	10	0
Pheidole Sp.O	3	0	0	0	0	0	0	0	0	0	11	1
Tetramorium sericerventre	27	3	1	19	2	10	79	71	5	7	31	42
Tetramorium Sp. Nr. constanciae	0	0	0	0	0	0	0	1	0	1	0	0
Tetramorium setuliferum	12	12	0	0	0	2	2	0	2	0	0	0
Tetramorium notiale	0	0	1	0	0	0	8	0	0	0	0	0
Tetramorium Sp. D	0	0	0	0	0	0	1	0	0	0	0	0
Tetramorium Sp. F	0	6	0	0	0	0	0	2	2	0	0	0
Tetramorium Sp. G	0	0	0	0	0	2	14	0	33	0	0	0
Tetramorium Sp. K	0	0	0	0	6	0	0	0	0	0	2	1
Tetramorium Sp. N	0	1	0	1	1	2	0	0	0	1	1	1
Tetramorium Sp. O	0	0	0	0	0	0	0	0	1	0	0	0
Tertramorium Sp Q	0	0	0	1	0	3	0	0	0	0	0	5
Leptogenys Sp. A	0	0	1	0	0	0	0	0	0	1	0	0
OdontomarchusSp.A	5	0	0	0	0	0	0	0	0	0	0	0
Odontomarchus Sp. B	0	0	0	0	0	0	0	0	0	0	0	1
Bothroponera crassa	0	0	0	0	0	0	0	0	0	1	0	0
Bothroponera kruegeri	2	0	15	1	1	5	3	3	0	0	0	0
Mesoponera caffraria	1	0	1	0	0	0	0	0	0	0	0	0
Solenopsis Sp.A	0	0	0	0	0	0	0	0	0	7	3	2
Plectrotena Sp. A	1	1	2	1	0	0	0	0	0	0	0	0
Species B	0	0	0	0	0	0	0	0	0	0	7	2
Sp. C	0	2	0	1	0	0	0	0	0	1	0	0

## Sheet: 09 Vegetation Structure
Treatment	Moss	Dung	Forb	Small woody (m)	Grass (m)	Litter	Bare ground (P/A)	Rock (P/A)	Wood	Stones	Distance to closest tree (m)	Canopy cover (%)	Habitat	Season
Bunch s	0	0	0	0.0005	0.14125	0	4	5	1	1	2.345	7	Bunch Grass	Summer
Bunch s	0	0	0.0015	0.025	0.066	0	7	4	1	4	2.02	8	Bunch Grass	Summer
Bunch s	0	0	0.029	0.05375	0.151282	0	14	1	0	0	0.6175	20.5	Bunch Grass	Summer
Bunch s	0	0	0.14175	0.09	0.113421	0	19	0	1	0	11.55	15.8	Bunch Grass	Summer
Bunch s	0	0	0.00375	0.02	0.183	0	2	0	0	0	1.115	0	Bunch Grass	Summer
Bunch s	0	0	0.0055	0.034	0.152051	0	11	0	1	0	1.7425	13.5	Bunch Grass	Summer
Bunch w	0	0	0.015	0	0.2165	20	14	6	1	0	4.94	21.7	Bunch Grass	Winter
Bunch w	0	5	0.0325	0.07125	0.172	22	15	3	1	0	4.5075	11.1	Bunch Grass	Winter
Bunch w	0	1	0.01125	0.0825	0.13625	3	33	0	2	0	1.785	11.5	Bunch Grass	Winter
Bunch w	0	0	0.005	0.03	0.15675	3	34	0	2	0	1.195	0	Bunch Grass	Winter
Bunch w	0	3	0	0.095	0.2915	12	25	0	1	0	1.70588	0	Bunch Grass	Winter
Bunch w	0	0	0.0125	0.0125	0.116667	8	30	3	0	0	2.6075	0	Bunch Grass	Winter
Lawn s	0	0	0.0075	0.025	0.00775	0	23	3	0	0	3.32	8	Grazing lawn	Summer
Lawn s	0	0	0.0115	0	0.0107692	0	23	0	0	0	4.65789	3	Grazing lawn	Summer
Lawn s	0	0	0.0065	0	0.004	0	20	0	0	0	2.00588	16	Grazing lawn	Summer
Lawn s	0	0	0.01325	0.02875	0.02975	0	19	0	0	0	0.825	9.5	Grazing lawn	Summer
Lawn s	0	0	0.013	0	0.01875	0	12	0	3	0	2.295	12.5	Grazing lawn	Summer
Lawn s	0	0	0.02825	0	0.0055	2	18	0	1	0	1.965	6.2	Grazing lawn	Summer
Lawn w	0	5	0.01325	0.0175	0.01475	13	16	0	3	0	2.045	0	Grazing lawn	Winter
Lawn w	0	2	0.00275	0.00875	0.0245	0	32	0	0	0	9.56	0	Grazing lawn	Winter
Lawn w	0	1	0.00475	0	0.00625	0	34	2	1	0	3.585	0	Grazing lawn	Winter
Lawn w	0	1	0.0045	0	0.0175	0	34	4	0	0	1.235	7	Grazing lawn	Winter
Lawn w	0	0	0.00375	0	0.0135	0	26	1	2	termite mounds & sand present	2.705	11.5	Grazing lawn	Winter
Lawn w	0	0	0.0402857	0	0.01575	0	31	2	0		4.73	0	Grazing lawn	Winter

[truncated: 1 more sheets: 10 Visible dots]
